# Supplementary material for: Is the stability of folates in dried blood microsamples sufficient to perform home-sampling studies?
Source: Royal Society of Chemistry journal article supplement (doi:10.1039/d3an01004j), 2023-12-26
Supplement: d3an01004j1.pdf [file d3an01004j1.pdf]

## Supporting Information

### **Is the stability of folates in dried blood microsamples sufficient to perform home-sampling studies?**

Liesl Heughebaert and Christophe Pol Stove\*

Laboratory of Toxicology, Department of Bioanalysis, Ghent University, Ottergemsesteenweg 460, 9000 Ghent, Belgium

\*Corresponding author: [Christophe.Stove@UGent.be](mailto:Christophe.Stove@UGent.be), +32 (0) 9 264 81 35

#### Supplementary Information Content

|                               |   |
|-------------------------------|---|
| 1. Supplemental Tables .....  | 2 |
| 2. Supplemental Figures ..... | 6 |

## 1. Supplemental Tables

**Table S-1.** Multiple reaction monitoring transitions and compound-specific MS parameters for all folate vitamers measured including the internal standards, CE: collision energy.

|                                                | Precursor ion (m/z) | Product ion (m/z) | Cone (V) | CE (eV) |
|------------------------------------------------|---------------------|-------------------|----------|---------|
| <b>5MTHF</b>                                   | 460.28              | 180.13            | 20       | 34      |
|                                                |                     | 313.20            | 20       | 16      |
| <b>5MTHF - <sup>13</sup>C5</b>                 | 465.30              | 180.13            | 20       | 34      |
|                                                |                     | 313.20            | 20       | 16      |
| <b>MeFOX</b>                                   | 474.30              | 283.90            | 25       | 35      |
|                                                |                     | 327.20            | 25       | 20      |
| <b>MeFOX - <sup>13</sup>C5</b>                 | 479.40              | 284.40            | 25       | 35      |
|                                                |                     | 327.20            | 25       | 20      |
| <b>THF</b>                                     | 446.24              | 166.15            | 4        | 44      |
|                                                |                     | 299.23            | 4        | 18      |
| <b>THF - <sup>13</sup>C5</b>                   | 451.10              | 166.15            | 4        | 44      |
|                                                |                     | 299.30            | 4        | 18      |
| <b>5,10CH<sup>+</sup>THF</b>                   | 456.24              | 282.19            | 4        | 50      |
|                                                |                     | 412.66            | 4        | 30      |
| <b>5,10CH<sup>+</sup>THF - <sup>13</sup>C5</b> | 461.20              | 282.19            | 4        | 50      |
|                                                |                     | 416.00            | 4        | 30      |
| <b>10FoFA</b>                                  | 470.18              | 176.10            | 26       | 42      |
|                                                |                     | 295.17            | 26       | 24      |
| <b>5FoTHF - <sup>13</sup>C5</b>                | 479.00              | 166.15            | 4        | 44      |
|                                                |                     | 327.20            | 4        | 18      |

**Table S-2.** Spiked concentrations used for the selectivity and matrix effects experiments.

| Concentration (nM) | 5MTHF | MeFOX | THF | 5,10CH <sup>+</sup> THF | 10FoFA |
|--------------------|-------|-------|-----|-------------------------|--------|
| low                | 450   | 65    | 30  | 30                      | 10     |
| high               | 900   | 375   | 375 | 375                     | 375    |

**Table S-3.** Ion ratios obtained in neat solvent and fresh whole blood matrix (both VAMS samples and DBS dried for 2.5 h) for the five different folate vitamers (mean (CV, %), n = 6).

|                      | <b>5MTHF</b> | <b>MeFOX</b> | <b>10FoFA</b> | <b>5,10CH<sup>+</sup>THF</b> | <b>THF</b> |
|----------------------|--------------|--------------|---------------|------------------------------|------------|
| <b>Neat solvent</b>  | 0.37 (2%)    | 0.20 (16%)   | 0.52 (5%)     | 0.39 (10%)                   | 0.31 (4%)  |
| <b>Matrix (VAMS)</b> | 0.34 (2%)    | 0.20 (11%)   | 0.47 (5%)     | 0.38 (8%)                    | 0.28 (5%)  |
| <b>Matrix (DBS)</b>  | 0.36 (3%)    | 0.18 (14%)   | 0.49 (5%)     | 0.38 (6%)                    | 0.32 (3%)  |

**Table S-4.** Absolute and internal standard (IS) – corrected matrix effects (ME) for 5MTHF, MeFOX, 10FoFA, 5,10CH\*THF and THF in VAMS samples and DBS (mean (CV, %)). ME were assessed in fresh samples (processed immediately after drying,  $t_0$ ) and in aged samples (processed after storage at 37 °C for 1 week) with n = 8 per condition.

|                   | VAMS - fresh |              |              |             | VAMS - aged  |              |              |             | DBS - fresh  |             |              |             | DBS - aged  |             |              |             |
|-------------------|--------------|--------------|--------------|-------------|--------------|--------------|--------------|-------------|--------------|-------------|--------------|-------------|-------------|-------------|--------------|-------------|
|                   | absolute     |              | IS-corrected |             | absolute     |              | IS-corrected |             | absolute     |             | IS-corrected |             | absolute    |             | IS-corrected |             |
|                   | low          | high         | low          | high        | low          | high         | low          | high        | low          | high        | low          | high        | low         | high        | low          | high        |
| <b>5MTHF</b>      | 115<br>(9%)  | 115<br>(7%)  | 101<br>(6%)  | 102<br>(6%) | 120<br>(7%)  | 120<br>(7%)  | 102<br>(4%)  | 100<br>(5%) | 103<br>(6%)  | 104<br>(8%) | 101<br>(3%)  | 101<br>(5%) | 104<br>(6%) | 106<br>(5%) | 99<br>(4%)   | 102<br>(4%) |
| <b>MeFOX</b>      | 56<br>(9%)   | 62<br>(10%)  | 100<br>(6%)  | 103<br>(4%) | 29<br>(7%)   | 31<br>(7%)   | 103<br>(4%)  | 106<br>(5%) | 31<br>(11%)  | 32<br>(10%) | 102<br>(5%)  | 104<br>(5%) | 29<br>(8%)  | 31<br>(6%)  | 102<br>(5%)  | 104<br>(4%) |
| <b>10FoFA</b>     | 120<br>(12%) | 121<br>(10%) | 104<br>(5%)  | 105<br>(6%) | 54<br>(10%)  | 56<br>(11%)  | 105<br>(6%)  | 107<br>(6%) | 98<br>(19%)  | 94<br>(19%) | 104<br>(6%)  | 102<br>(5%) | 49<br>(11%) | 49<br>(10%) | 109<br>(8%)  | 111<br>(5%) |
| <b>5,10CH*THF</b> | 121<br>(10%) | 123<br>(7%)  | 95<br>(9%)   | 97<br>(7%)  | 134<br>(14%) | 131<br>(11%) | 97<br>(11%)  | 96<br>(9%)  | 116<br>(12%) | 111<br>(7%) | 100<br>(8%)  | 101<br>(5%) | 118<br>(7%) | 110<br>(7%) | 99<br>(7%)   | 94<br>(7%)  |
| <b>THF</b>        | 101<br>(10%) | 102<br>(6%)  | 101<br>(4%)  | 99<br>(6%)  | 82<br>(11%)  | 84<br>(9%)   | 88<br>(5%)   | 87<br>(6%)  | 86<br>(10%)  | 86<br>(7%)  | 98<br>(5%)   | 96<br>(5%)  | 70<br>(10%) | 73<br>(7%)  | 86<br>(7%)   | 87<br>(6%)  |

## 2. Supplemental Figures

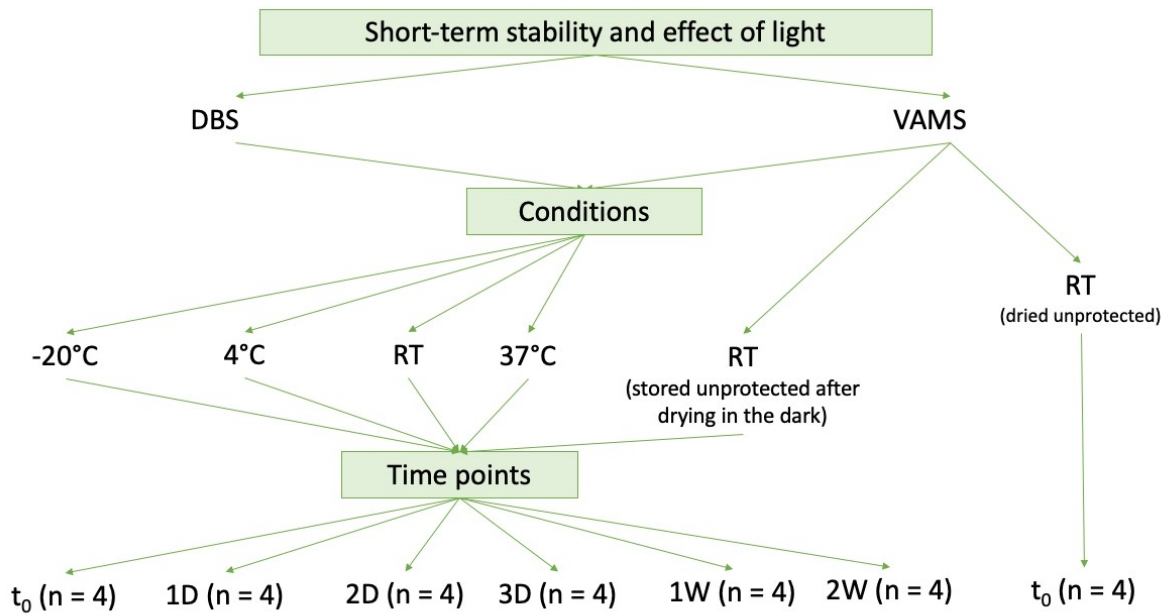

Fig. S-1 Schematic overview of the short-term stability and effect of light experiment (n = 4 technical replicates). Dried blood spots (DBS) and volumetric absorptive microsamples (VAMS) were processed and analyzed in separate analytical runs. Abbreviations: RT: room temperature,  $t_0$ : baseline condition, 1D: one day storage, 2D: two day storage, 3D: three day storage, 1W: one week storage, 2W: two week storage.

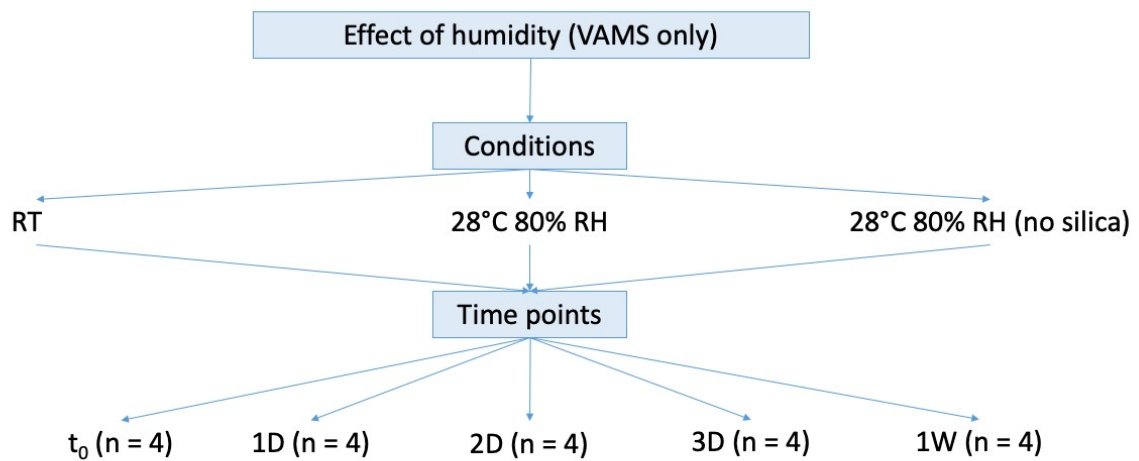

Fig. S-2 Schematic overview of the effect of humidity experiment (n = 4 technical replicates). Abbreviations: RH: relative humidity, RT: room temperature,  $t_0$ : baseline condition, VAMS: volumetric absorptive microsampling, 1D: one day storage, 2D: two day storage, 3D: three day storage, 1W: one week storage.

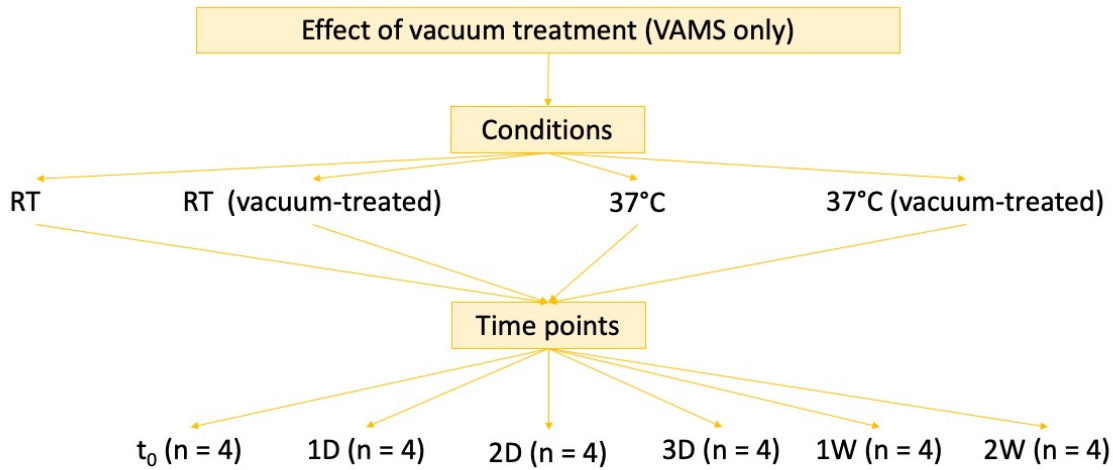

Fig. S-3. Schematic overview of the effect of vacuum treatment experiment (n = 4 technical replicates). Abbreviations: RT: room temperature, t<sub>0</sub>: baseline condition, VAMS: volumetric absorptive microsampling, 1D: one day storage, 2D: two day storage, 3D: three day storage, 1W: one week storage, 2W: two week storage.

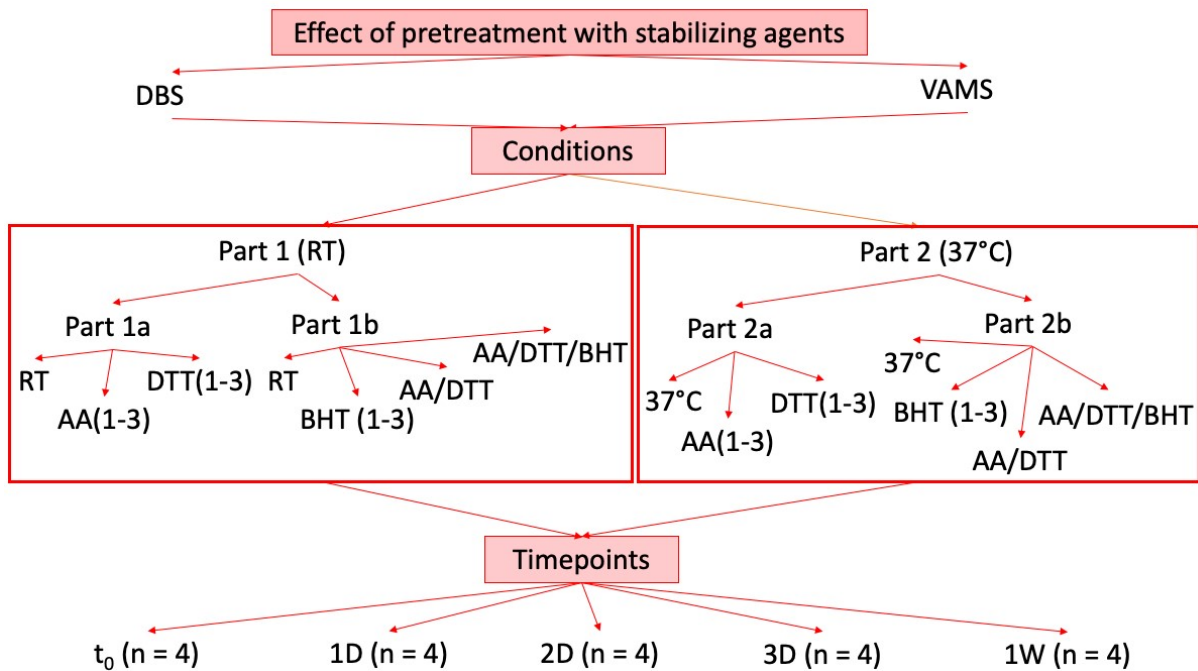

Fig. S-4. Schematic overview of the effect of stabilizing agents experiments. For practical reasons, dried blood spots (DBS) and volumetric absorptive microsamples (VAMS) were processed and analyzed in separate analytical runs and also room temperature (RT) and 37 °C samples needed to be processed separately (part 1 and part 2, respectively) as well as a few of the stabilizing agents (part 1a-b and part 2a-b, respectively). Abbreviations: t<sub>0</sub>: baseline condition, 1D: one day storage, 2D: two day storage, 3D: three day storage, 1W: one week storage, AA(1-3): three different concentrations of ascorbic acid, DTT(1-3): three different concentrations of DL-dithiothreitol, BHT(1-3): three different concentrations of butylated hydroxytoluene, AA/DTT: mixture of ascorbic acid and DL-dithiothreitol and AA/DTT/BHT: mixture of ascorbic acid, DL-dithiothreitol and butylated hydroxytoluene.

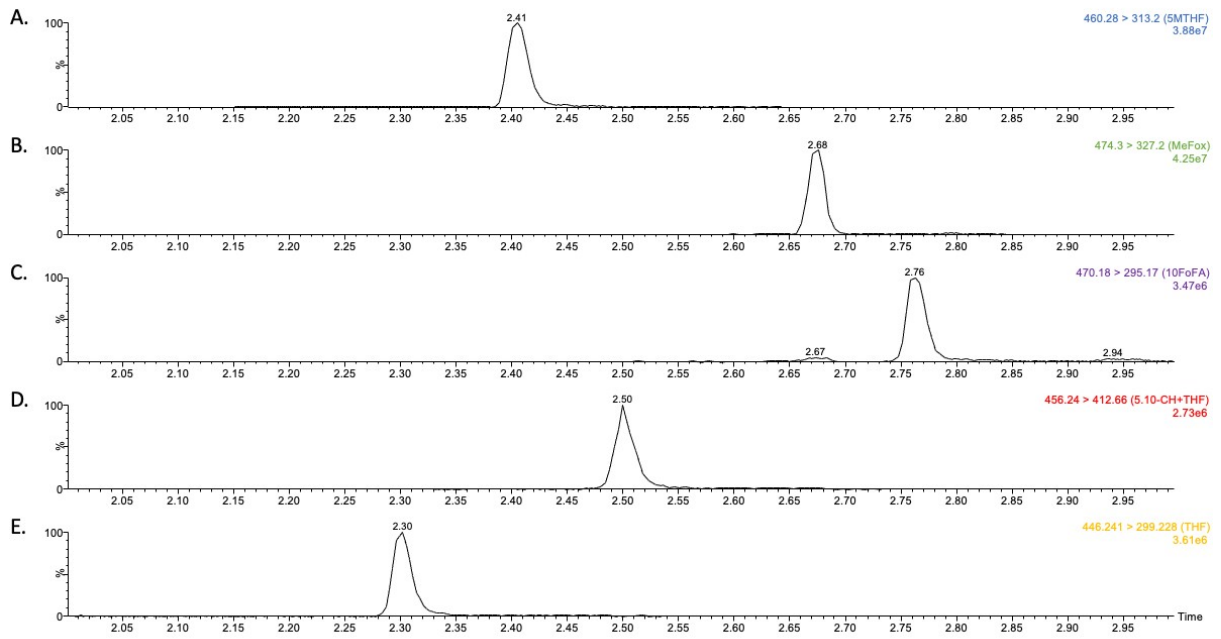

**Fig. S-5.** Chromatographic separation of the five monitored folates in an authentic blood sample dried on a volumetric absorptive microsampling (VAMS) device. 5-methyltetrahydrofolate (A), MeFOX (B), 10-formylfolic acid (C), 5,10-methenyltetrahydrofolate (D) and tetrahydrofolate (E).
